# Supplementary material
Source: PubMed Central journal article supplement (PMC5739936)

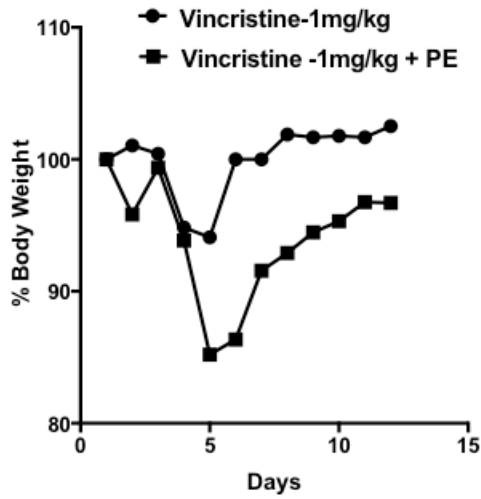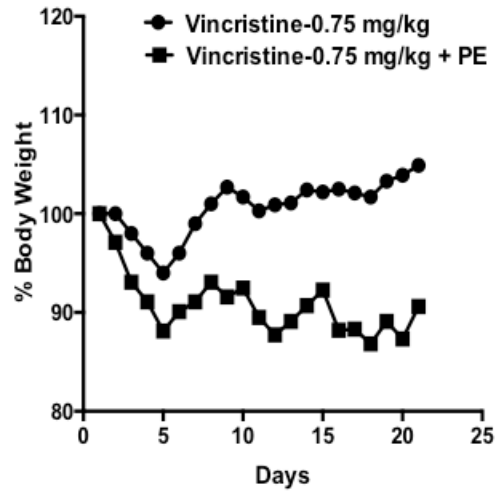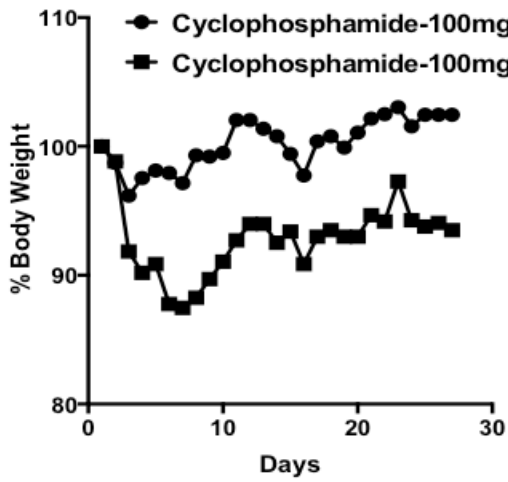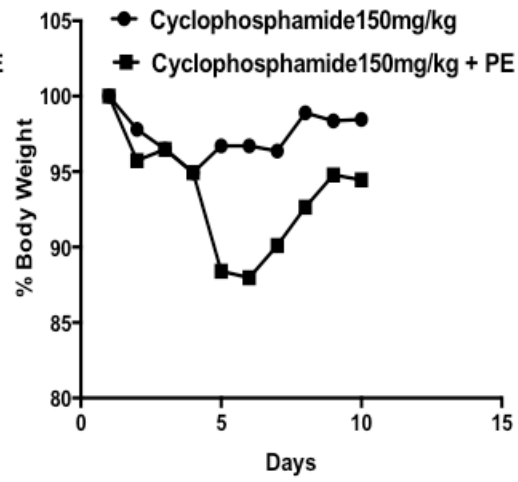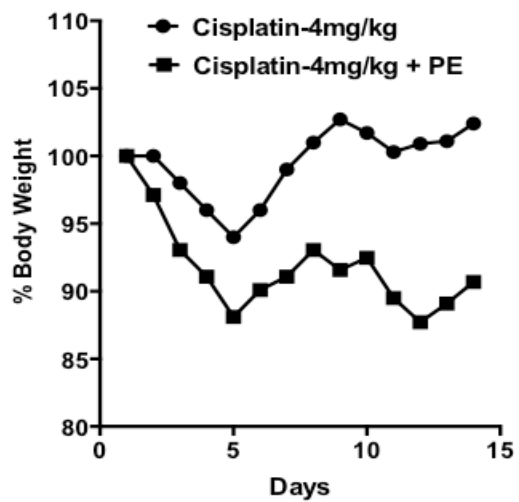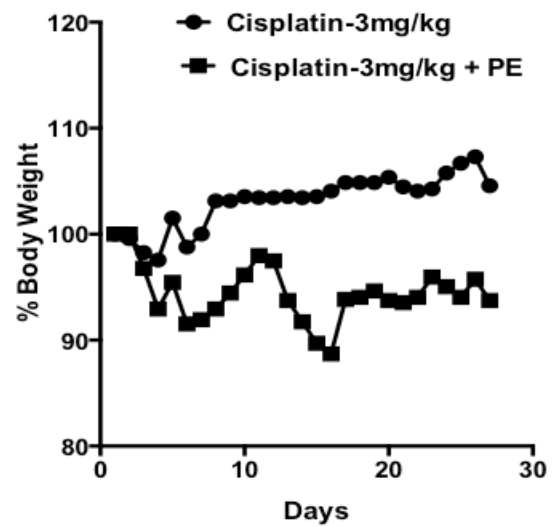

Supplement: NIHMS911250-supplement-Supp_FigS1.pdf [file NIHMS911250-supplement-Supp_FigS1.pdf]
